# Supplementary material for: Life-cycle modification in open oceans accounts for genome variability in a cosmopolitan phytoplankton
Source: PubMed Central journal article supplement — ISME J. 2014 Dec 2;9(6):1365–77. doi: 10.1038/ismej.2014.221 (PMC4438323; doi:10.1038/ismej.2014.221), 2014-12-02
Supplement: ismej2014221x1.pdf [file ismej2014221x1.pdf]

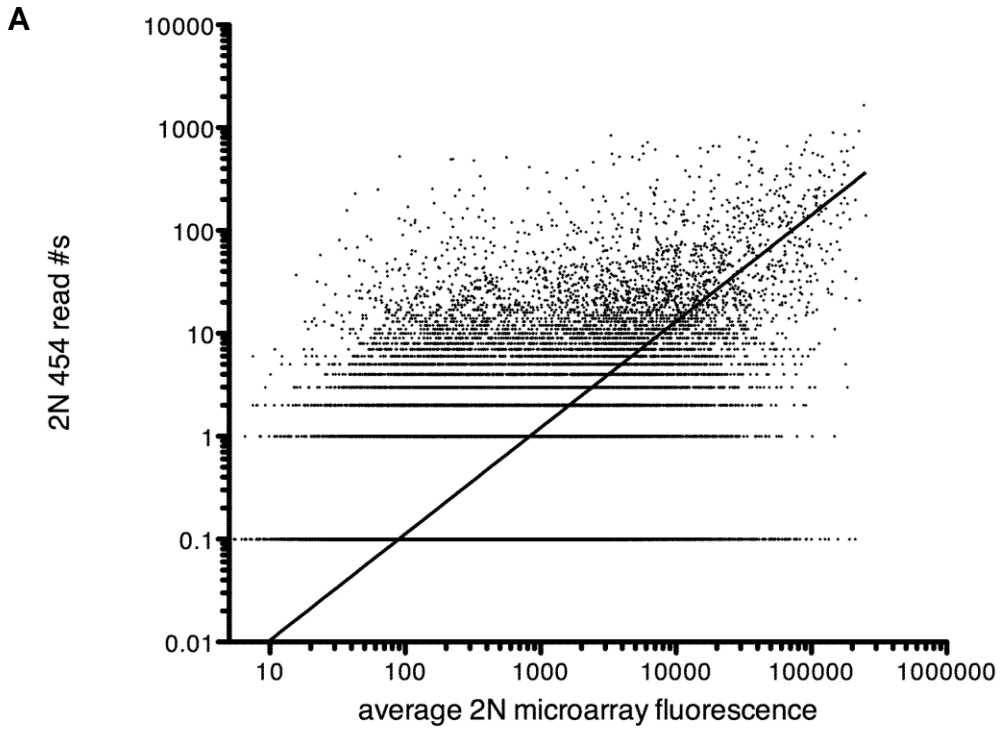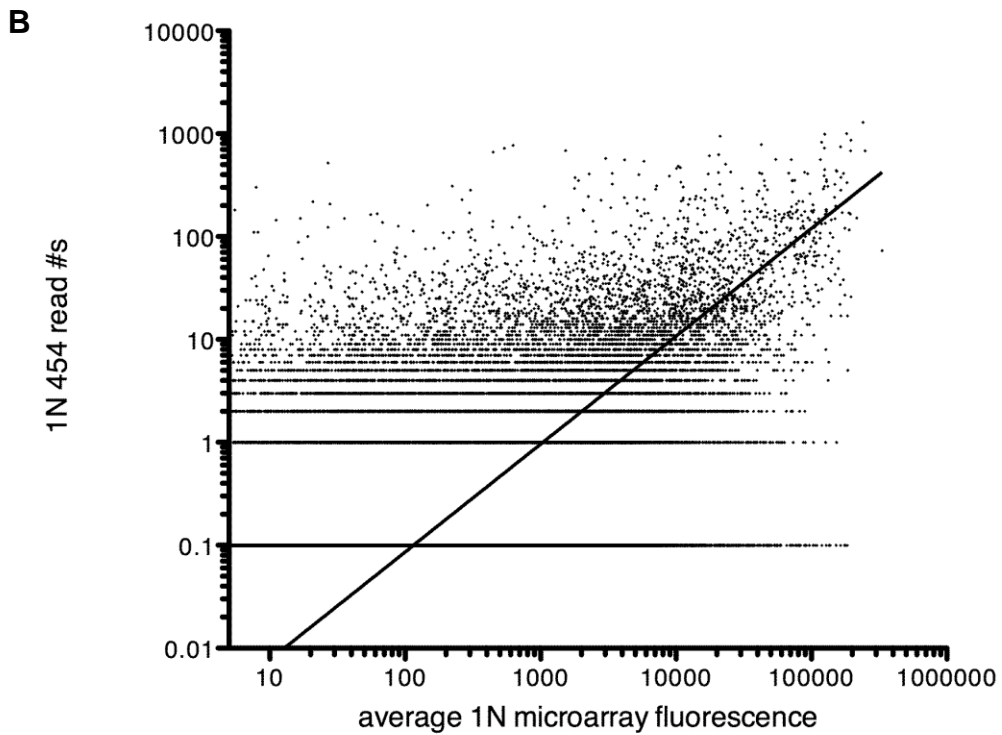

Figure S1

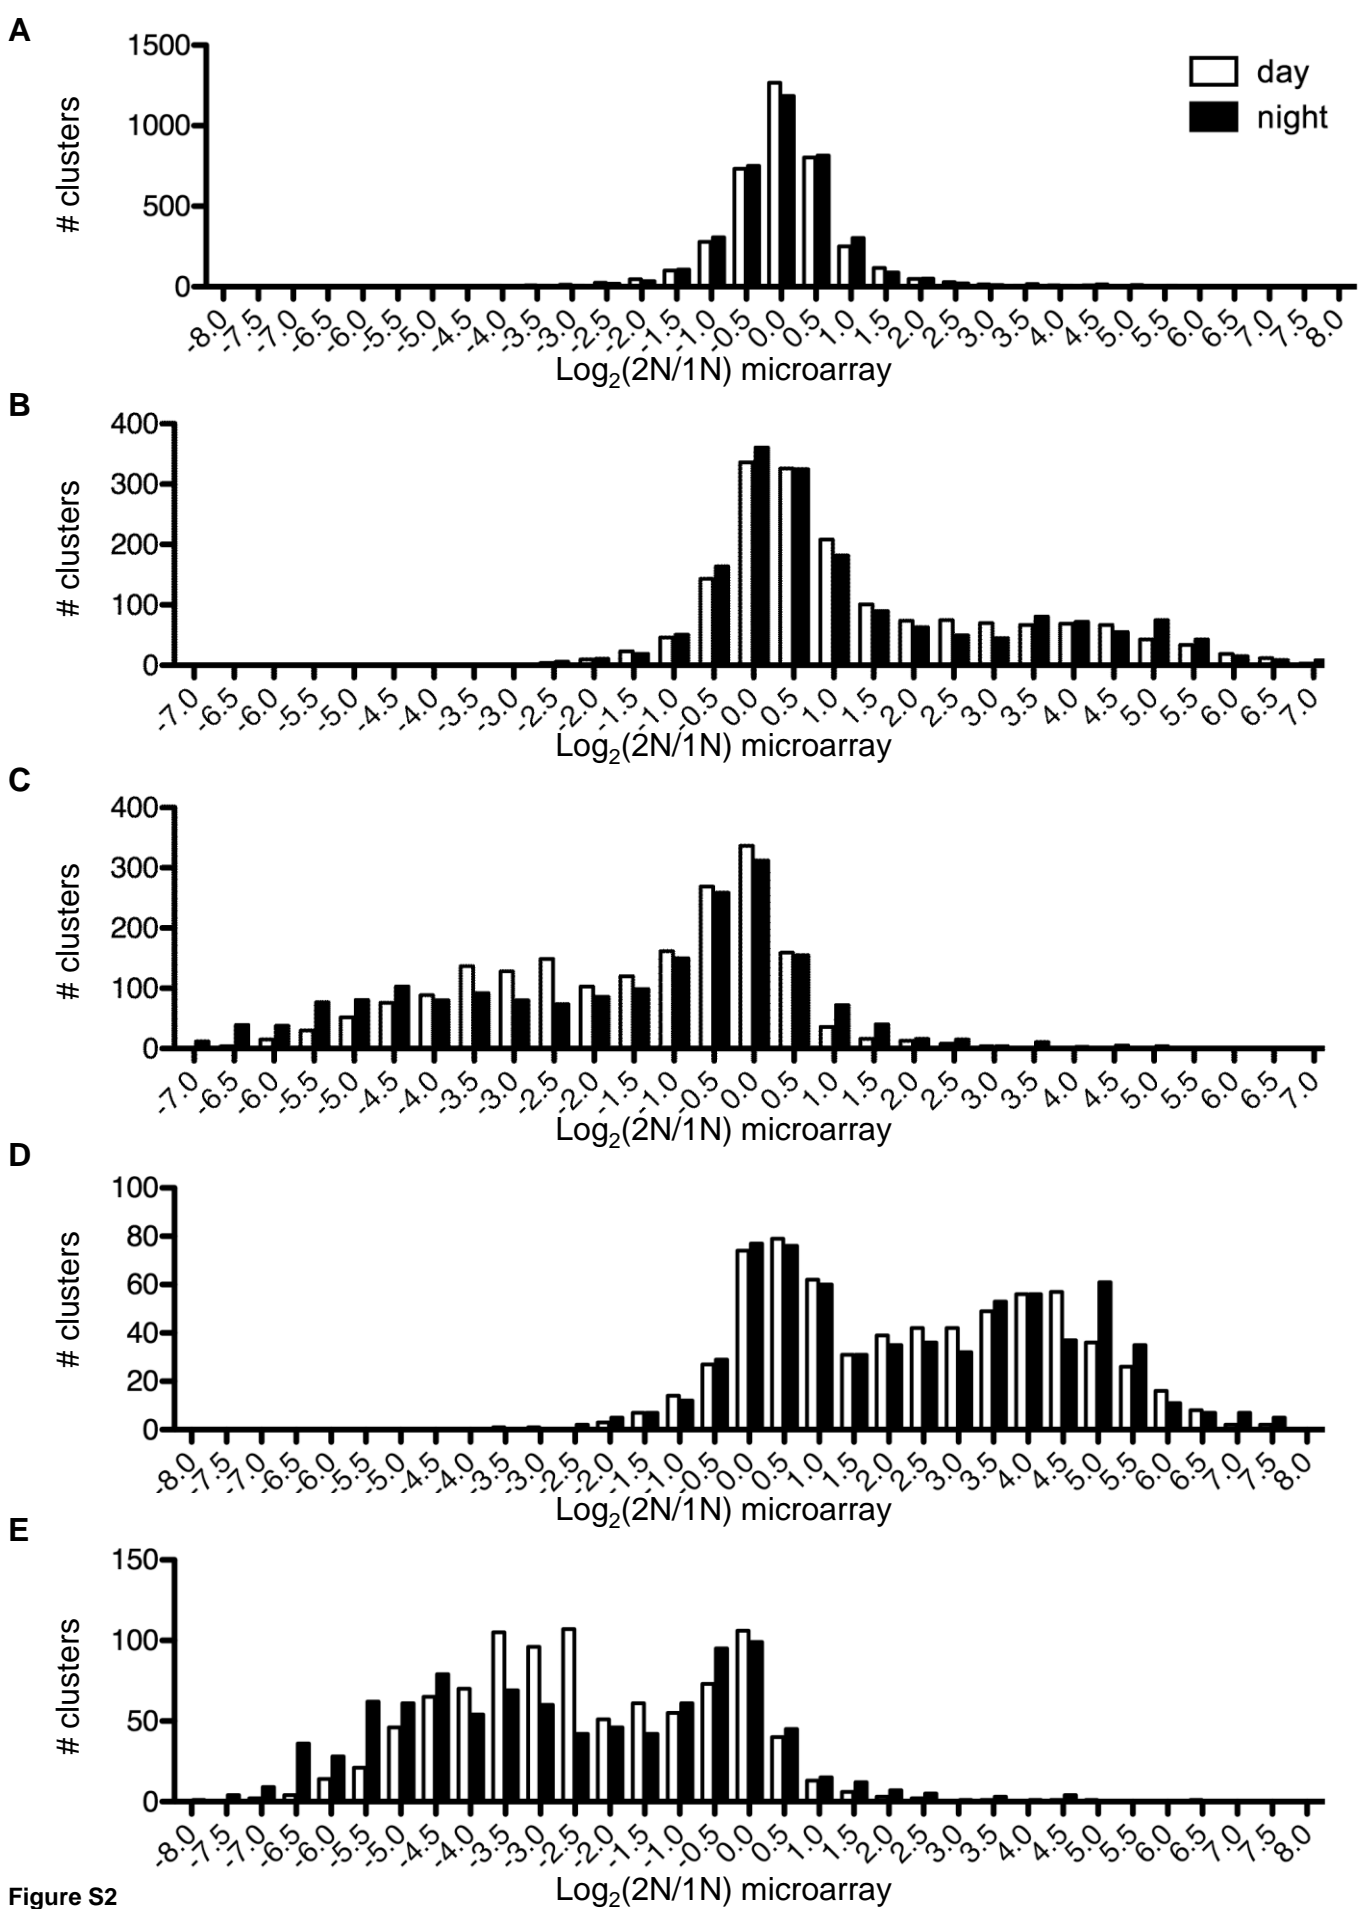

Figure S2

**A**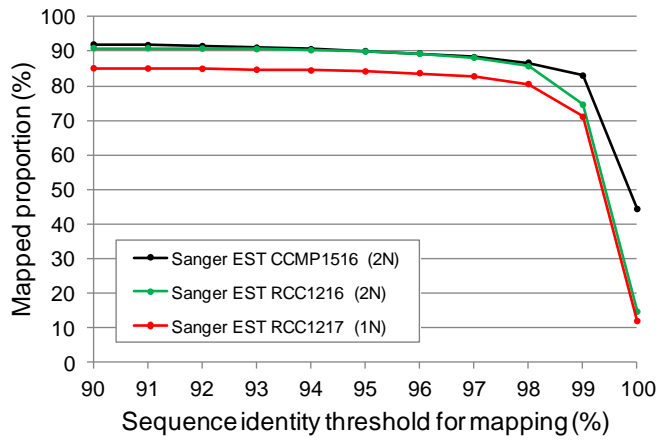**B**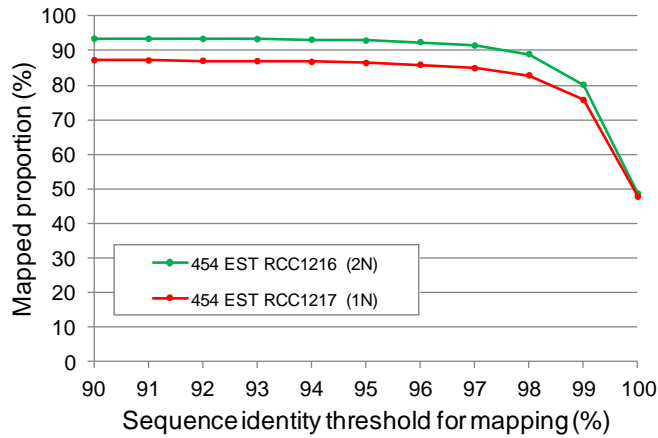**C**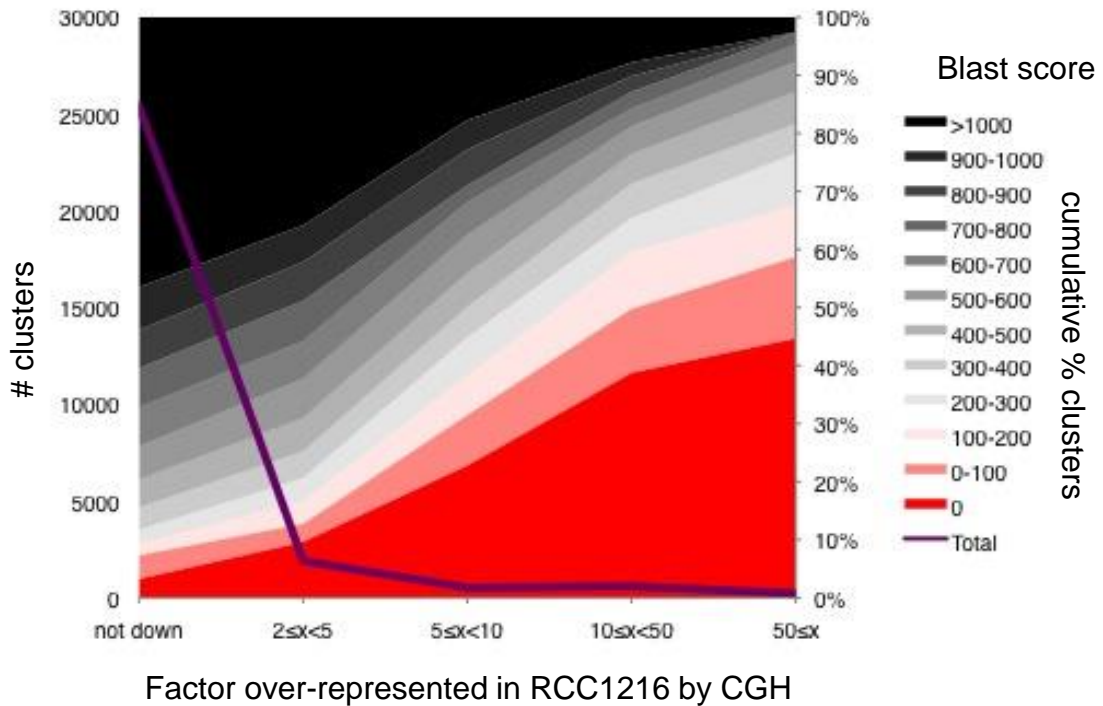

Figure S3

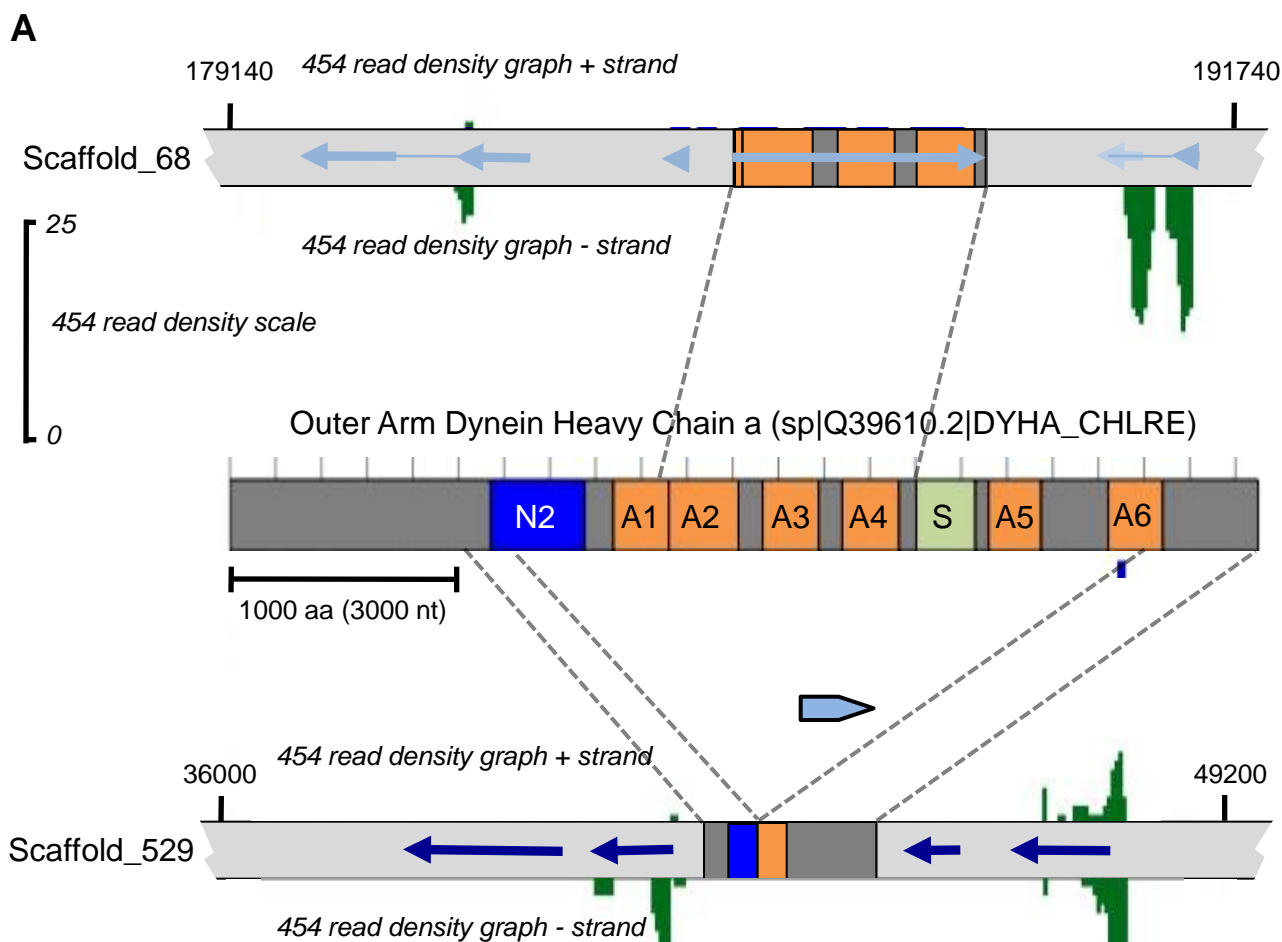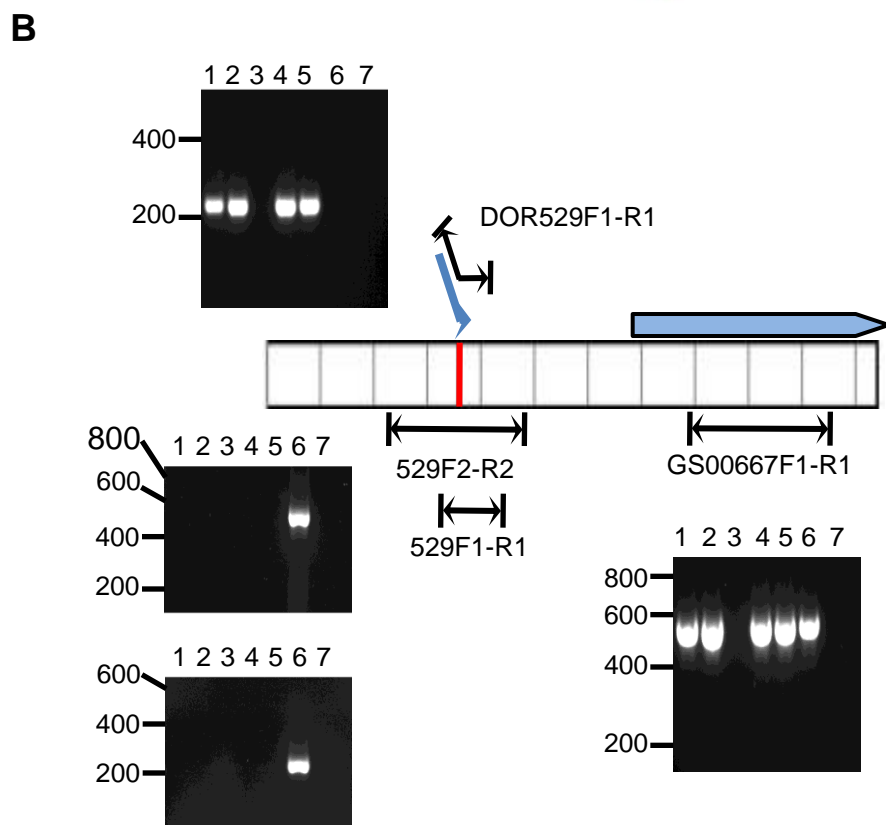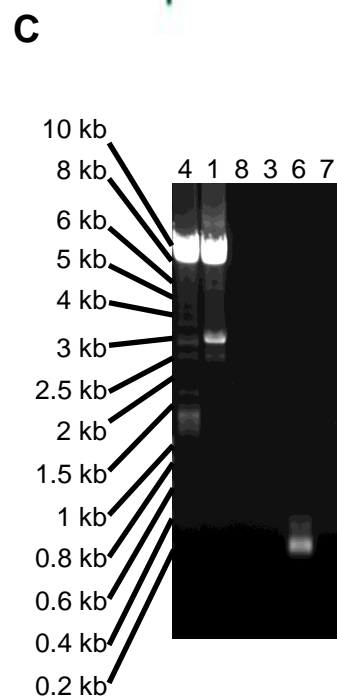

Figure S4

>gDNAb529F1\_-\_C01\_2010-05-12\_id\_3364\_005.ab1  
TGGCGAGGTGGTGGACCAGGCAACAAAGGAGGACAAGATGGAGCAGACGCTGACGAAGCTGGAGGAGACCTGGAAGGACA  
TCGAGTTTAAATTCGACAGGCACGCGGAGACGGAGTTTACCTCATCCGGATGCAGGAGGAAGACTTCGAGATGCTTGAGG  
ACAACCAGCTGGTGGTGCAGGGGATGATGGCCTCCAAGTACCTGGCCACCTTCGAGGAGCCCGTCACGCGATGGCAGAAG  
GACCTTTCCTCCGTGTCAGACGTGCTCGGTATTATGCTGGATGTGCAGCGCAAGTGGGCCTATCTCGAGACGCTATTTCATCG  
GCTCAGAGGAGGTGAAGCGTGAGCTGCCGGCGGAC

>[sp|Q39610.2|DYHA\\_CHLRE](#) RecName: Full=Dynein alpha chain, flagellar outer arm; AltName: Full=DHC alpha Length=4499  
Score = 147 bits (372), Expect = 7e-39 Identities = 67/117 (58%), Positives = 93/117 (80%), Gaps = 0/117 (0%) Frame = +2  
Query 2 GEVVDQATKEDKMEQLTKLEETWKDIEFKFDRHAETEYVYLIRMQEEDFEMLEDNQLVVQ 181  
GE+VD+A KE+KME +KL +TW +EF+F RH+ +V+ ++M EEDFE LEDNQ+ VQ  
Sbjct 1270 GEIVDRAQKEEKMEIAIRKLNLDTWTRVEFQFHRHKDYDVHTVKMAEEDFEALDNQVQVQ 1329  
  
Query 182 GMMASKYLATFEFPVTRWQKDLSSVSDVLGIMLDVQRKWAYLETFIGSEEVKRELP 352  
GM+A++Y+ATF+++ WQK L+ V+DV IM ++QR WAYLE+LFI SEEVK+ELP  
Sbjct 1330 GMIANRYMATFKDEILGWQKLNLDVADVQNQIMAEIQRWAYLESLEFIHSEEVKKELP 1386

>gDNAb529R1\_-\_F01\_2010-05-12\_id\_3364\_011.ab1  
GACTGCATGATACCCTCGGGCAGGGTCTGCATGTCGGGCAGCGGTGGAGGCTCGGCCGAGAGGAAGCAGCGGAAATTCCT  
GTGTCCACCTCAGCCGCAATCTCCAGCTTTCGCTCGAGTATCGGCAACCATGACTGCATGAGGTGGACGTTTTGCAGAAAG  
ACCCAGCCGCCGTCGCGGTTGAAGCGGTGAGTACGTTCTCGGCATTCTTCTCCTGCCCTGGCCCATGGAGATTGAGACG  
TACTGCTGATTGGCCTCGGTGTACCCTAGCTTTGCGCCAGGTTCTCGATATCGACGCCCGGTTCAACACCGGGGAAGAGG  
ACAAAGAAGAGCGGCGTCCGAAAGTGGAGTCCGCAACGTTGCTGTCATGTCGAACGTAGGCTGCGACATGTAGCGCTCG  
CCCATCTCCTGCACGATGTACCTCGTACGCGCGG

>[sp|Q39610.2|DYHA\\_CHLRE](#) RecName: Full=Dynein alpha chain, flagellar outer arm; AltName: Full=DHC alpha Length=4499  
Score = 149 bits (377), Expect = 3e-39 Identities = 76/146 (53%), Positives = 94/146 (65%), Gaps = 1/146 (0%) Frame = -3  
Query 437 AVTRYIVQEMGERYSQPTFDMDDTFADSTFATPLFFVLPFGVDPGVDIENLGAKLGYTE 258  
A+ + MG Y++Q F +S+ ATP+FF+LFPG P +IE KGY+  
Sbjct 3842 ALQNFCEHMMGSDYVNVQDAFSPAAMMDESSATPIFFILFPGYSPSKEIEVYANKCGYSV 3901  
  
Query 257 ANQQYVSISMGQGQEKNAENVLD RFTADGGWVFLQNVHLMQSWLPILERKLEIAAEVGHK 78  
AN+ ISMGQGQE AE VLD++T +GGWVFL NVHLMQ W+P LERKLEIAAE H  
Sbjct 3902 ANGRCLISMGGQEAPEAEVLDKYTREGGWVFLDNVHLMQGWIPKLERKLEIAAESAH 3961  
  
Query 77 NFRCFLSAEP-PPLPDMQTVPEGIMQ 3  
+FRCF SAEP P +PE I+Q  
Sbjct 3962 DFRCFSAEPINGAPHANIIPESILQ 3987

Score = 19.6 bits (39), Expect = 4.2 Identities = 6/7 (86%), Positives = 7/7 (100%), Gaps = 0/7 (0%) Frame = -3  
Query 323 LFPGVDP 303  
LFPG+DP  
Sbjct 1965 LFPGIDP 1971

Score = 19.2 bits (38), Expect = 5.5 Identities = 5/9 (56%), Positives = 8/9 (89%), Gaps = 0/9 (0%) Frame = -2  
Query 360 CRLHLCDAA 334  
CR+ +CDA+  
Sbjct 1667 CRIRICDAS 1675

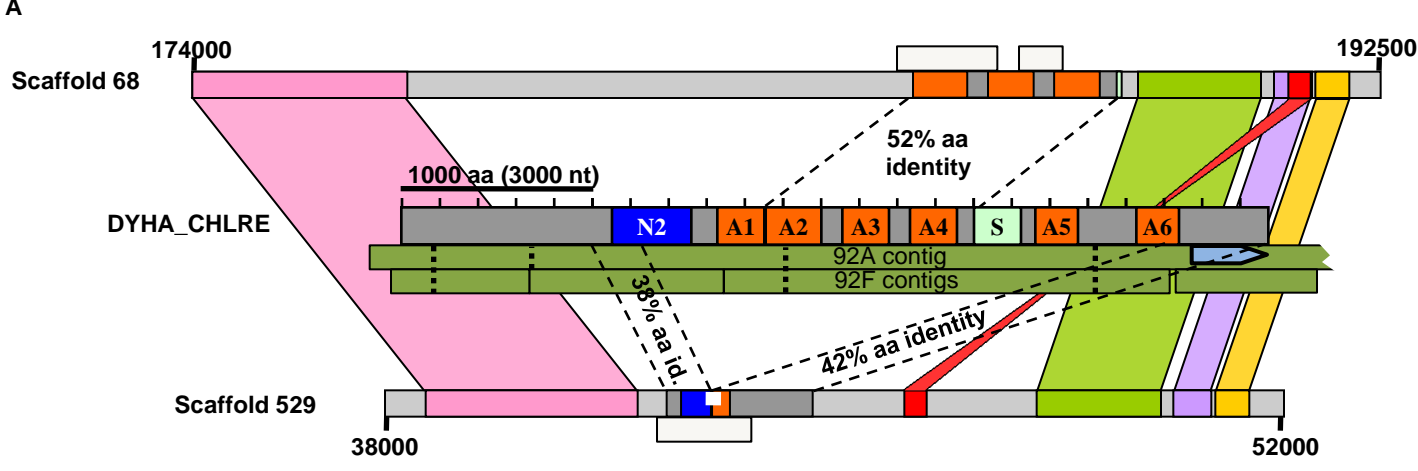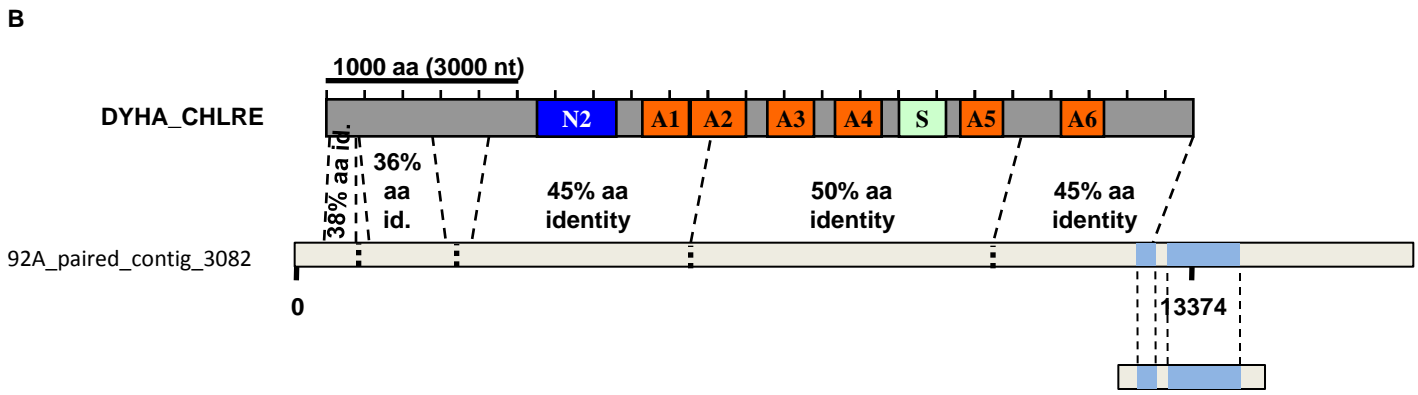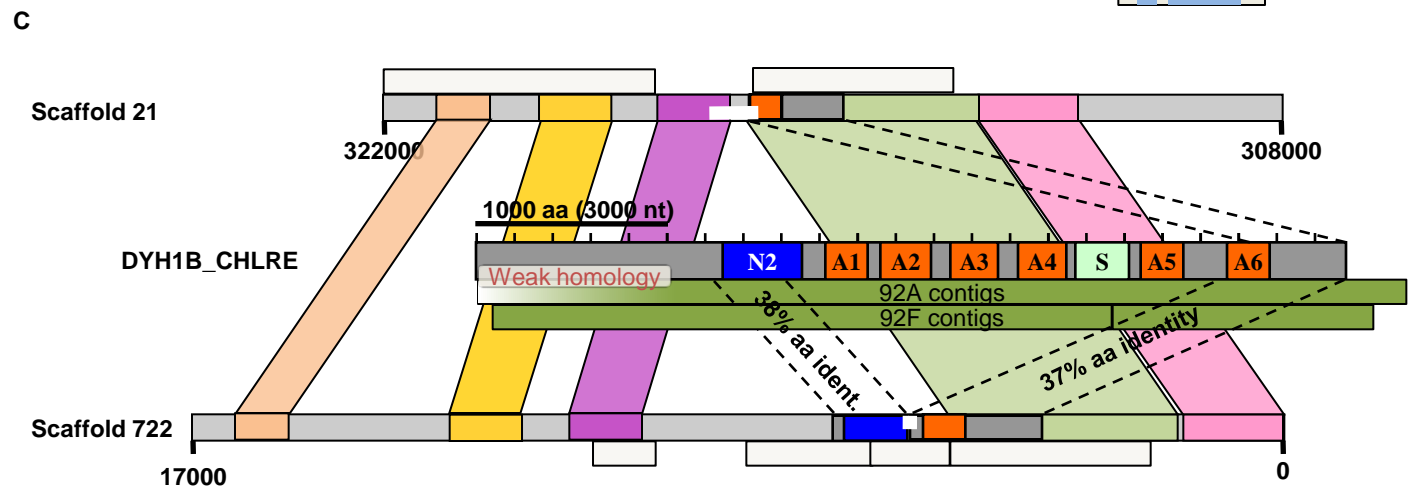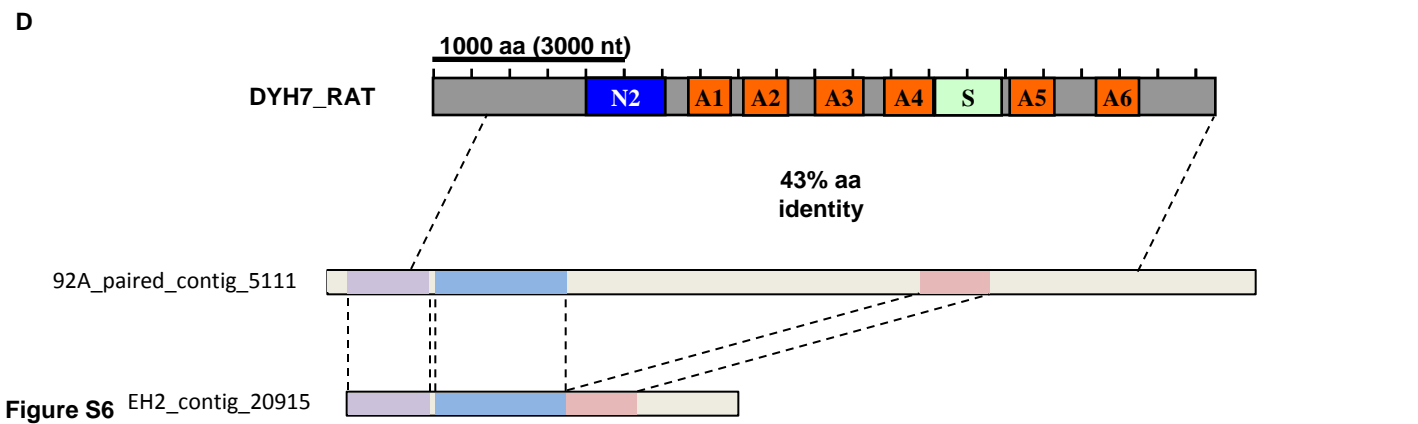

Figure S6 EH2\_contig\_20915

A

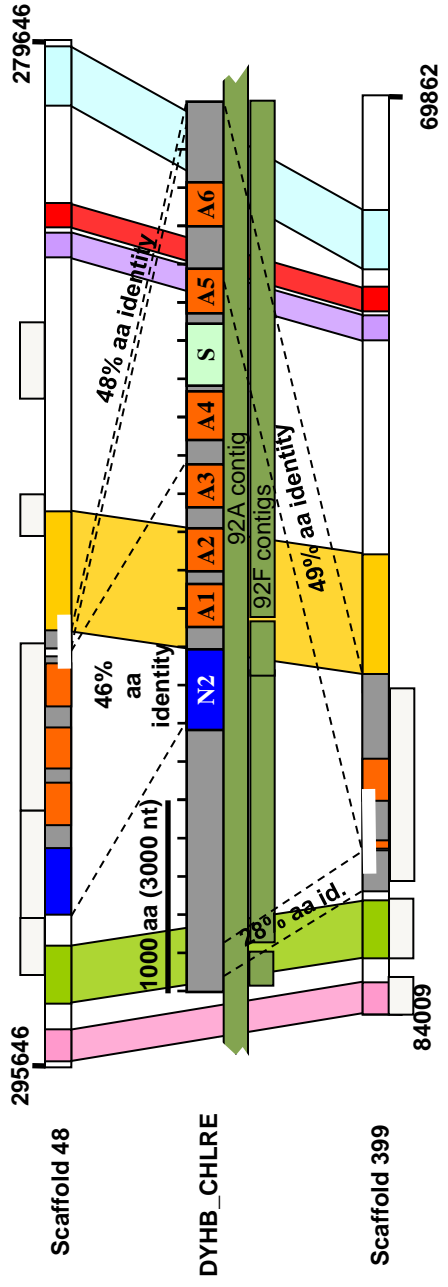

B

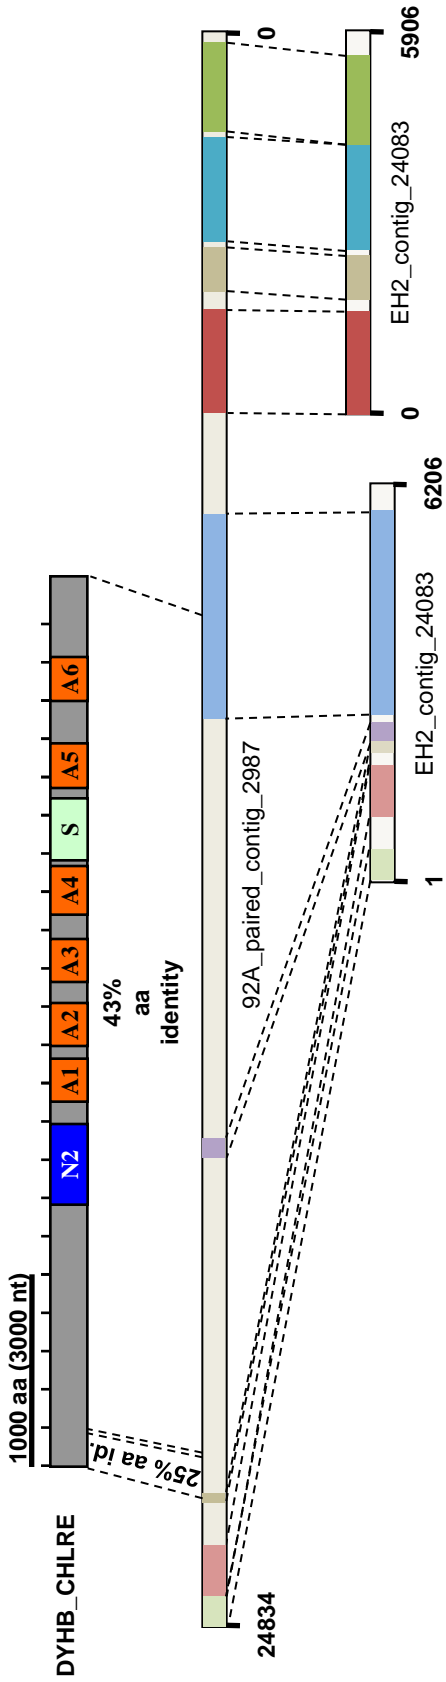

Figure S7

A

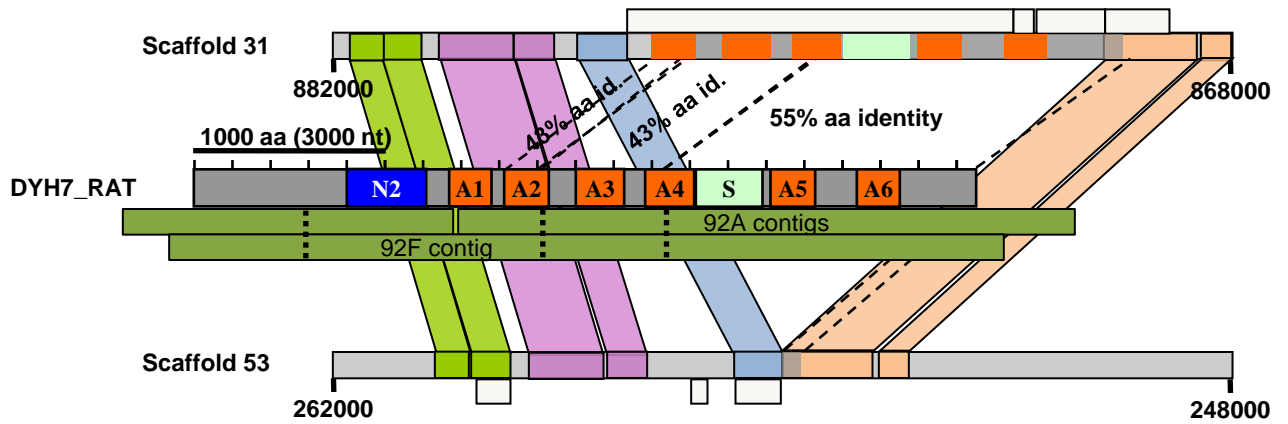

B

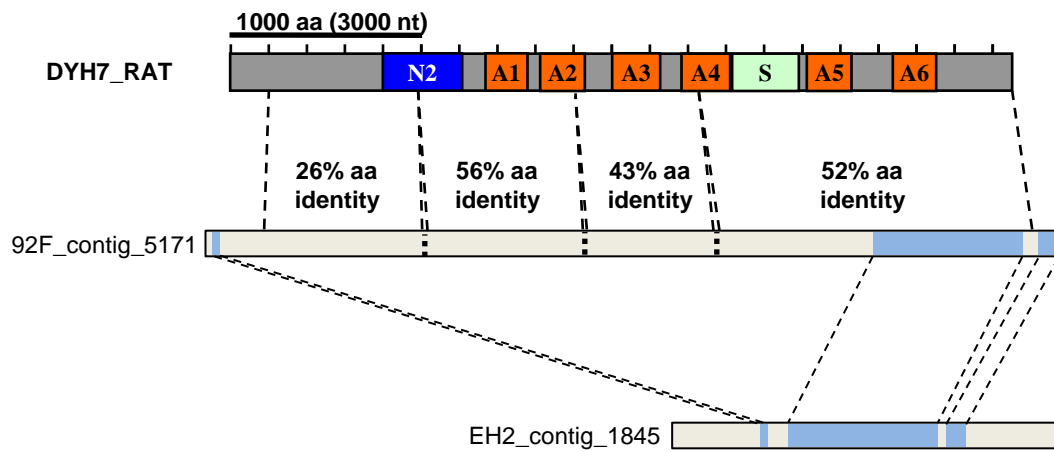

Figure S8



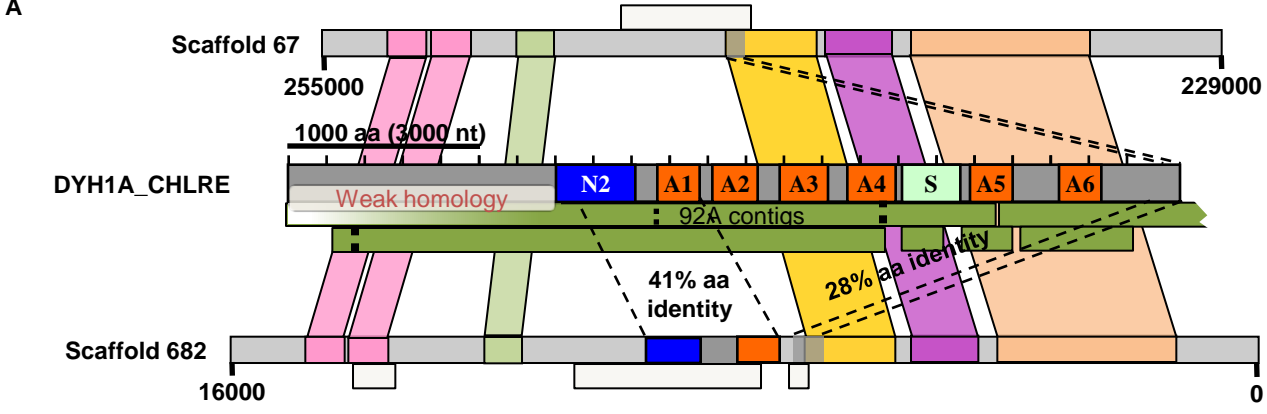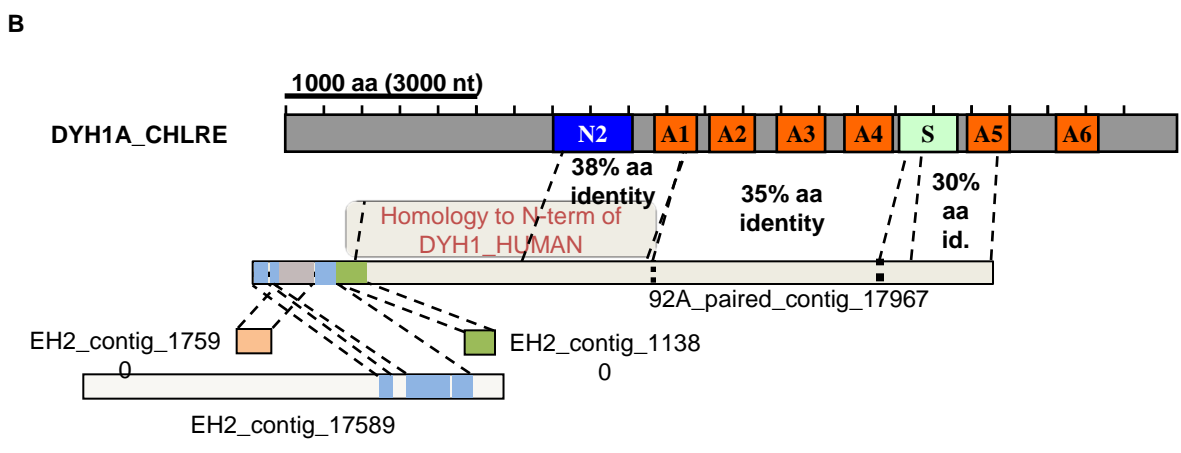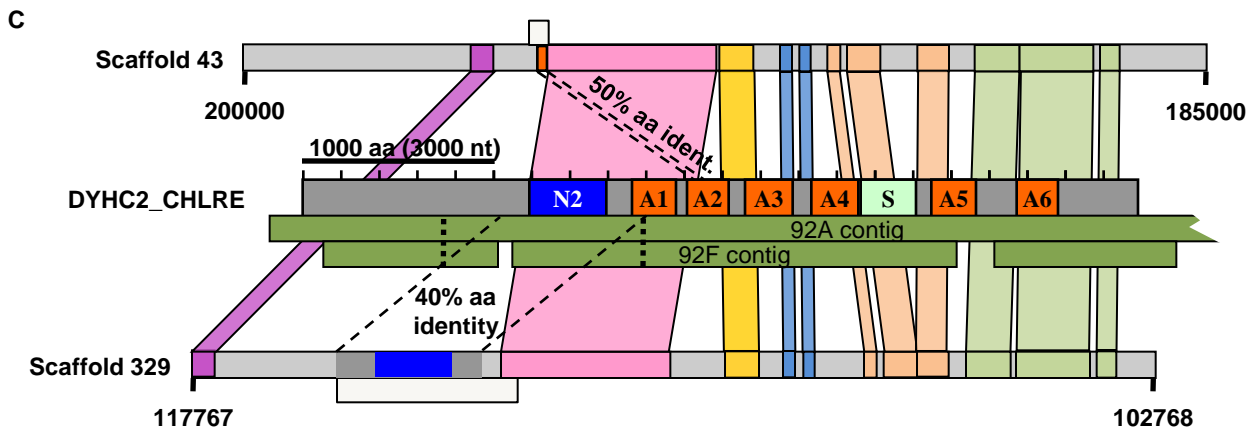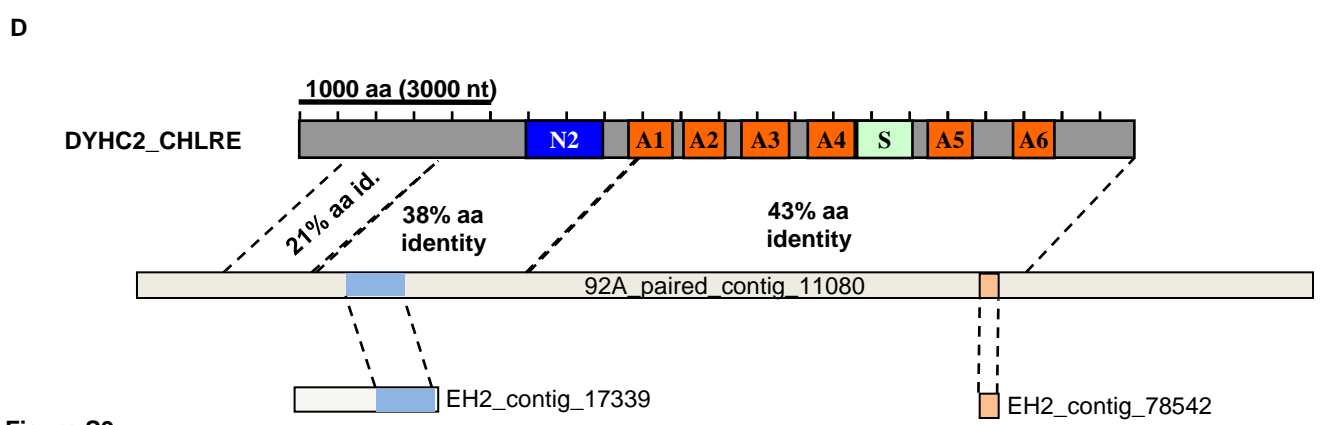

Figure S9

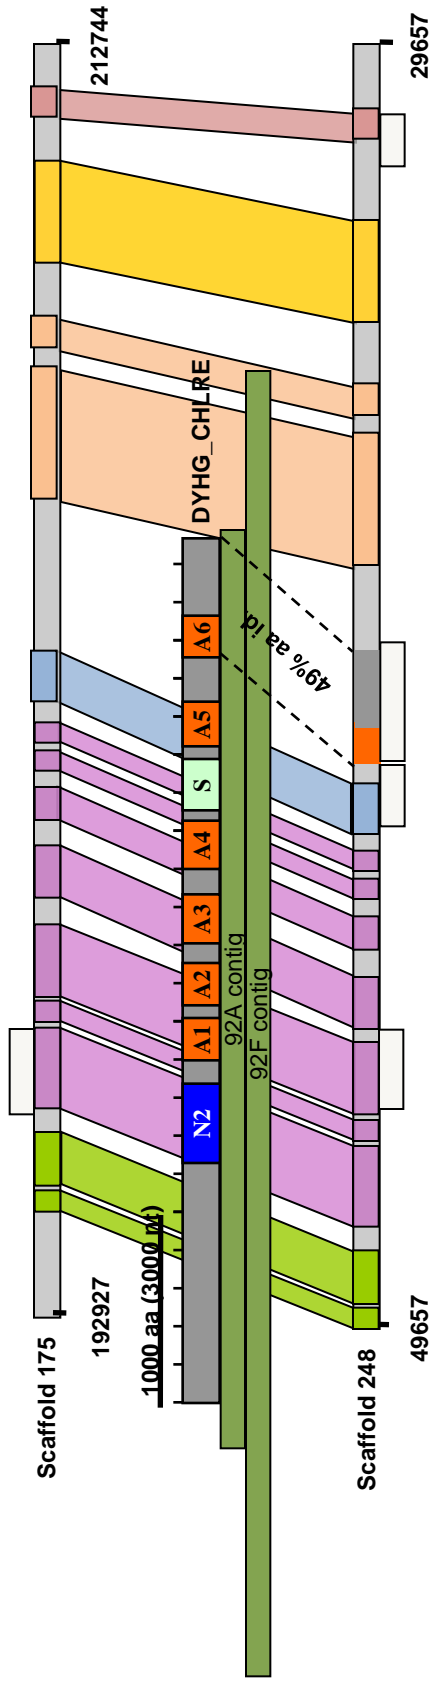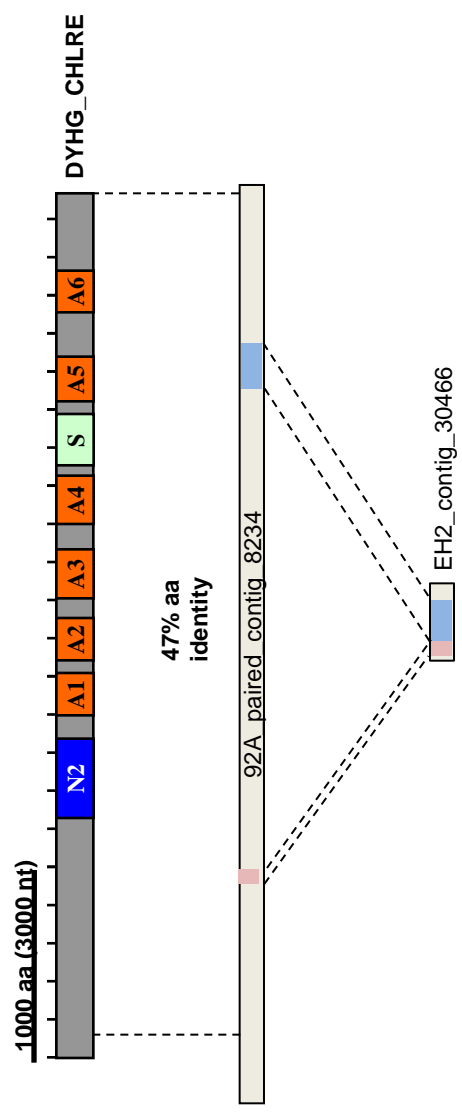

Figure S10

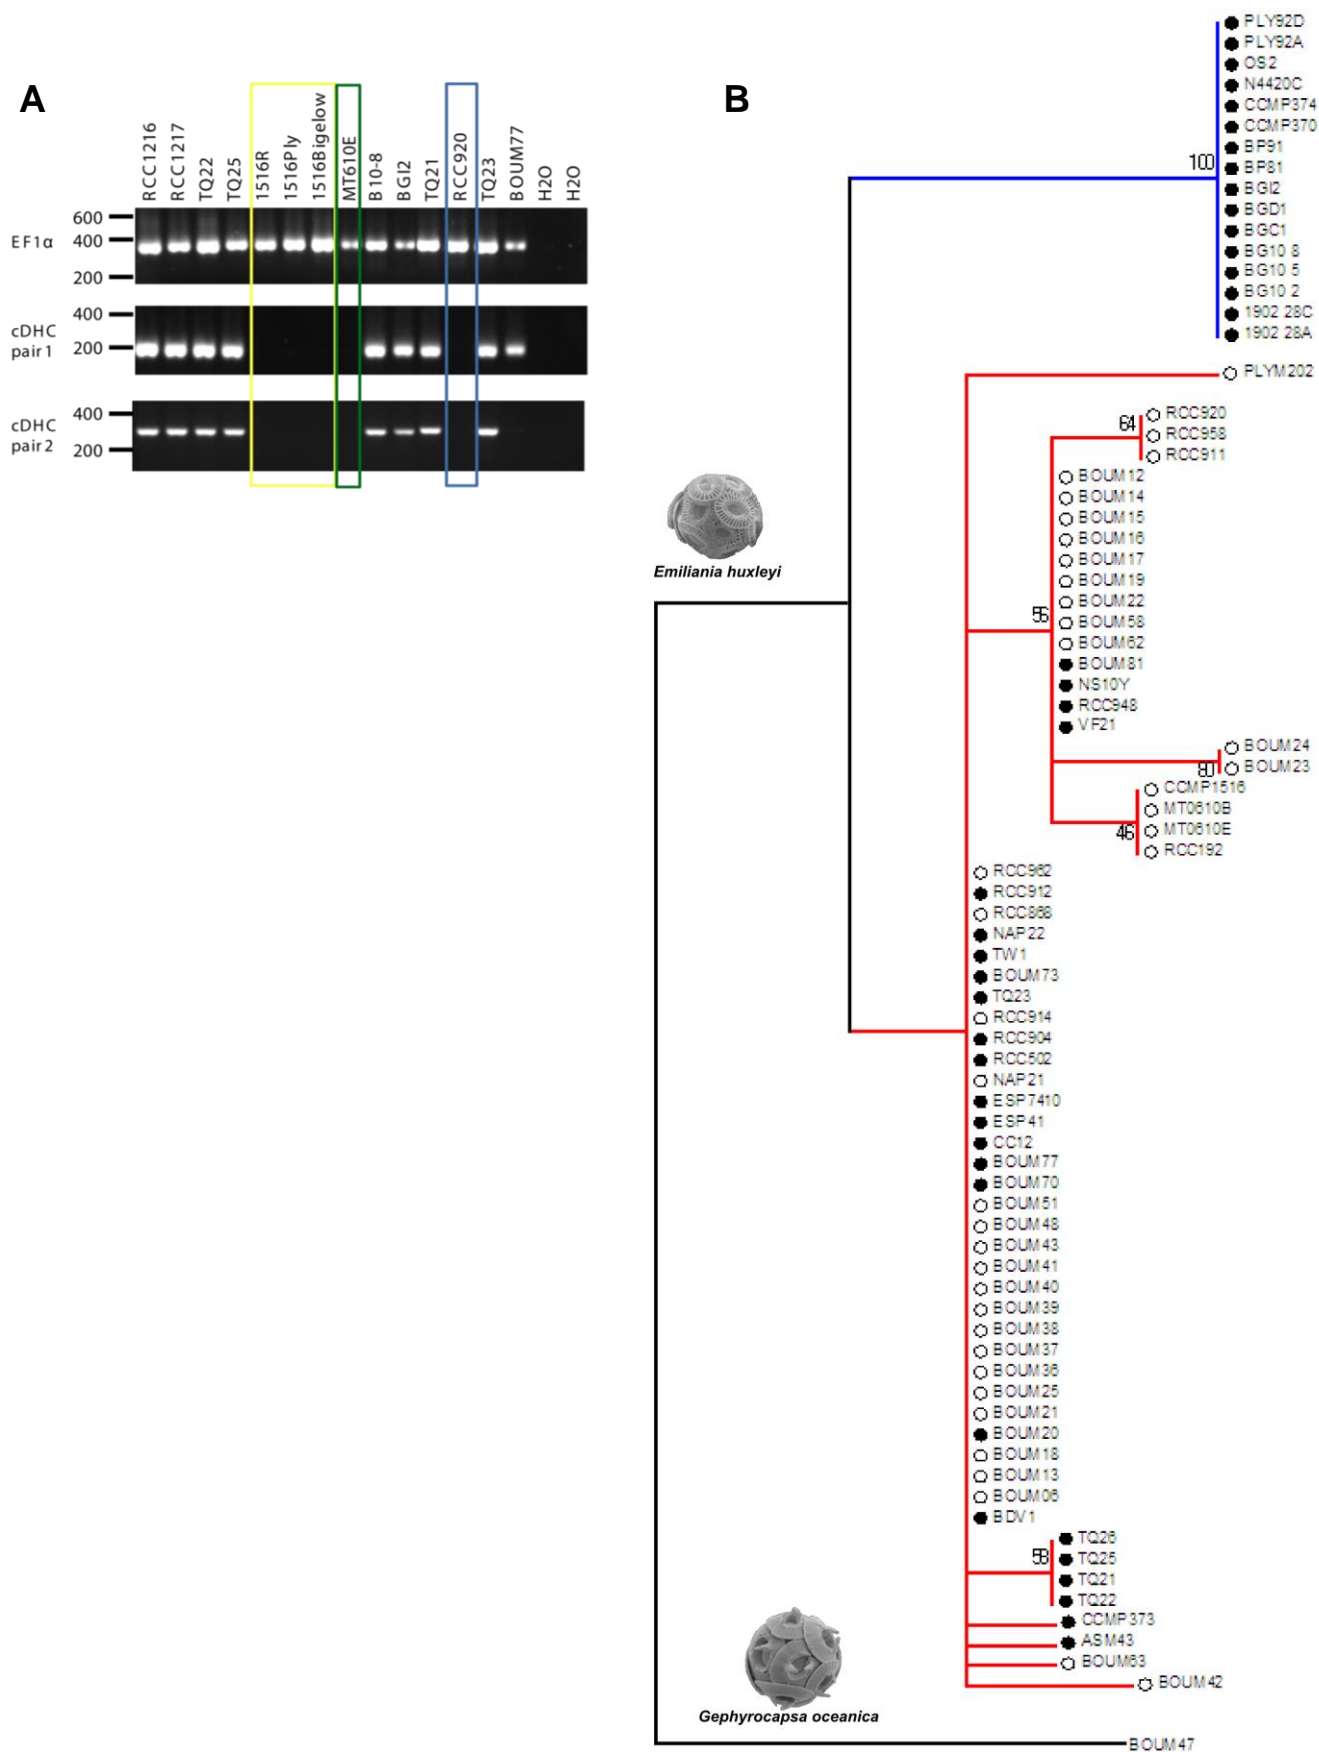

Figure S11

**A**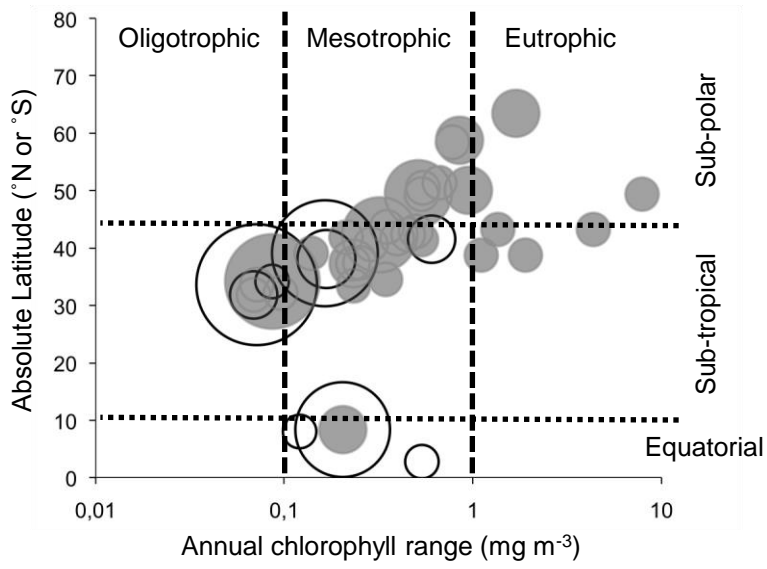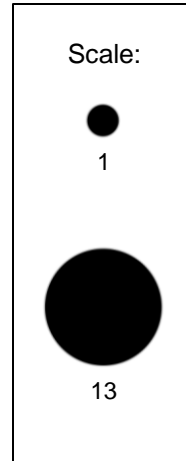**B**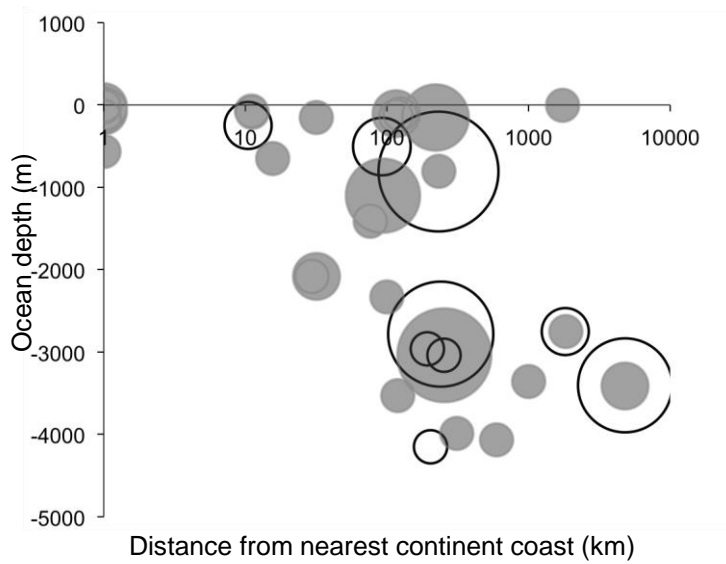

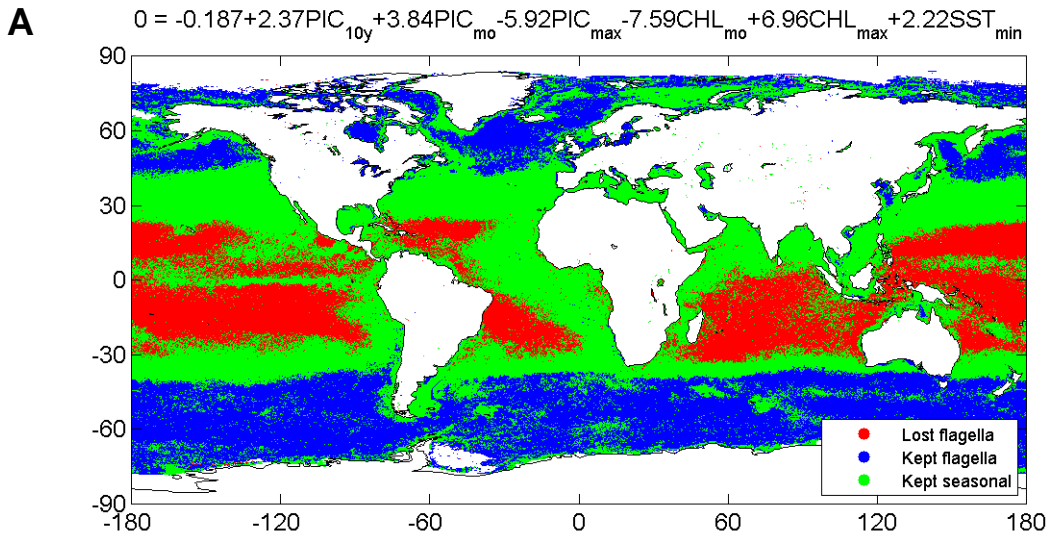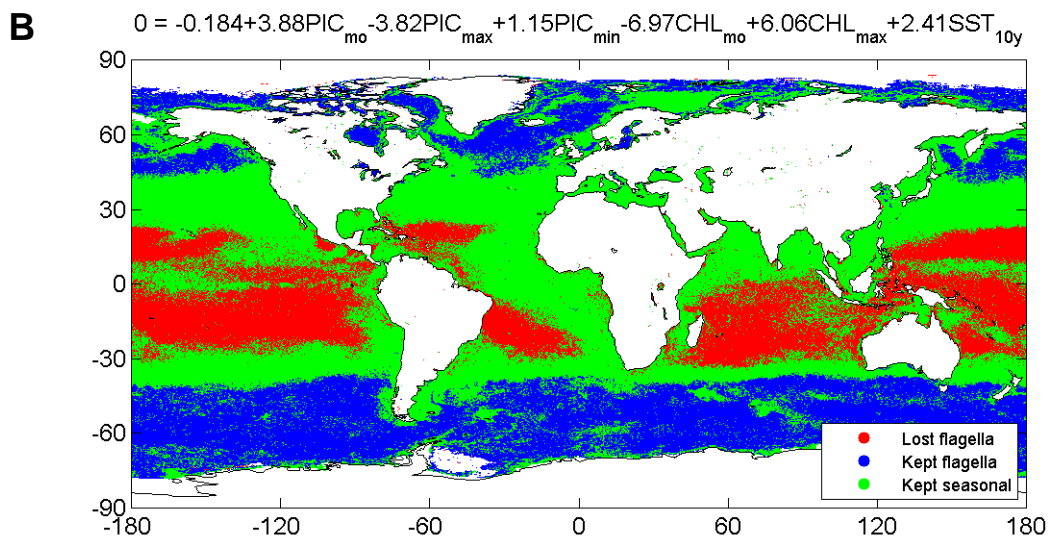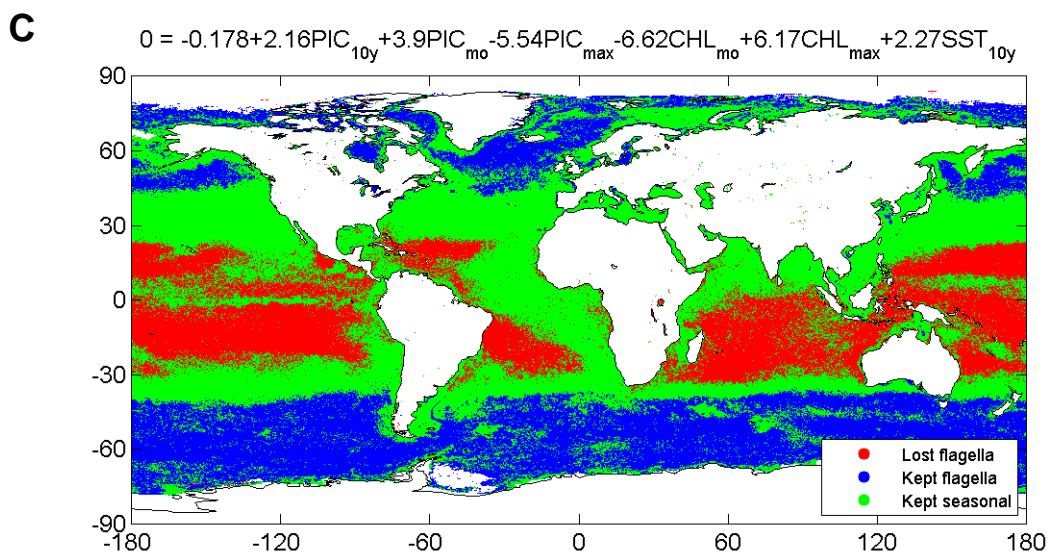

Figure S13

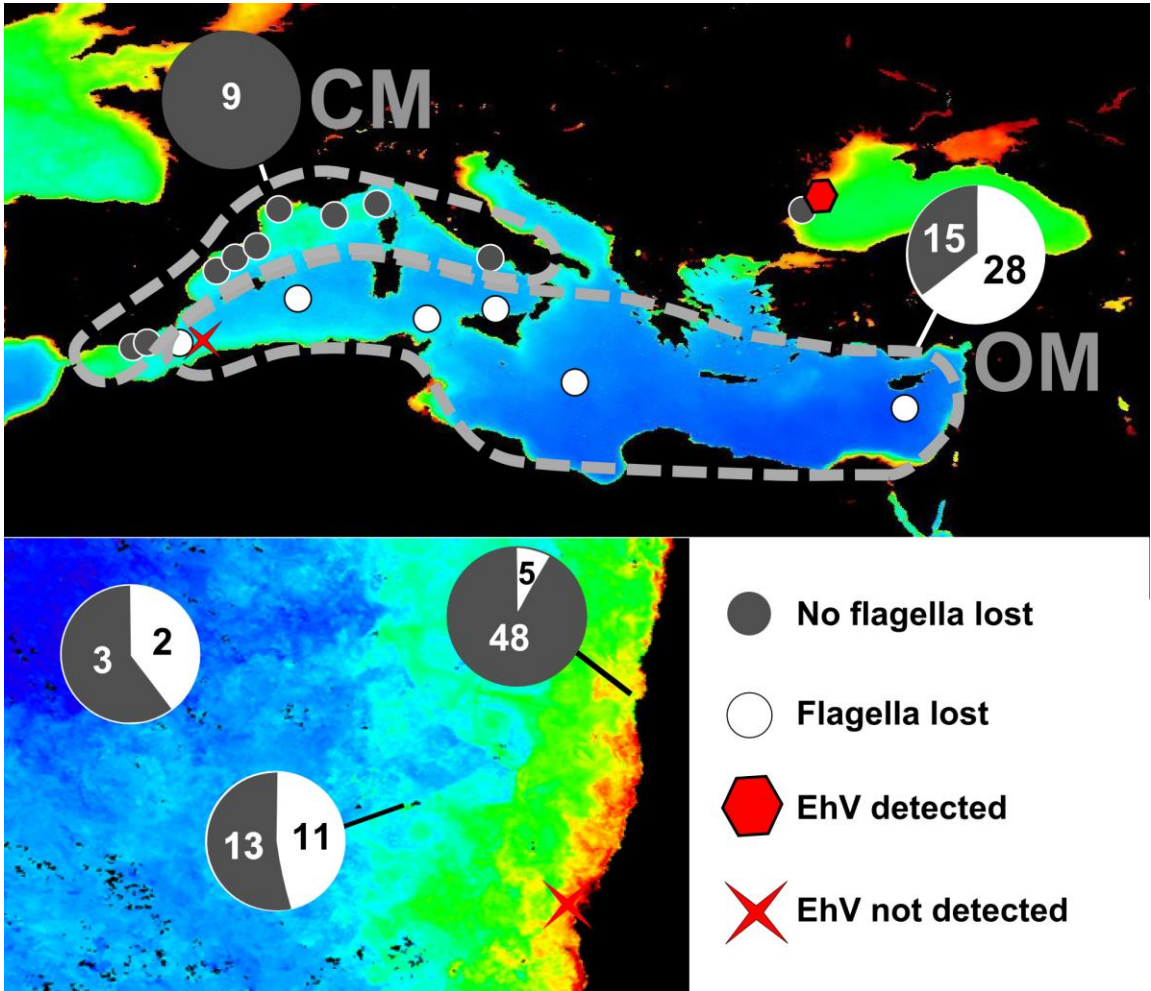

Figure S14
